# Supplementary material for: No Influence of Dopamine System Gene Variations on Acute Effects of MDMA
Source: PubMed Central journal article supplement (PMC6821788; doi:10.3389/fpsyt.2019.00755), 2019-10-24
Supplement: Image_1.pdf [file Image_1.pdf]

## Supplementary Material

### Supplementary Figures

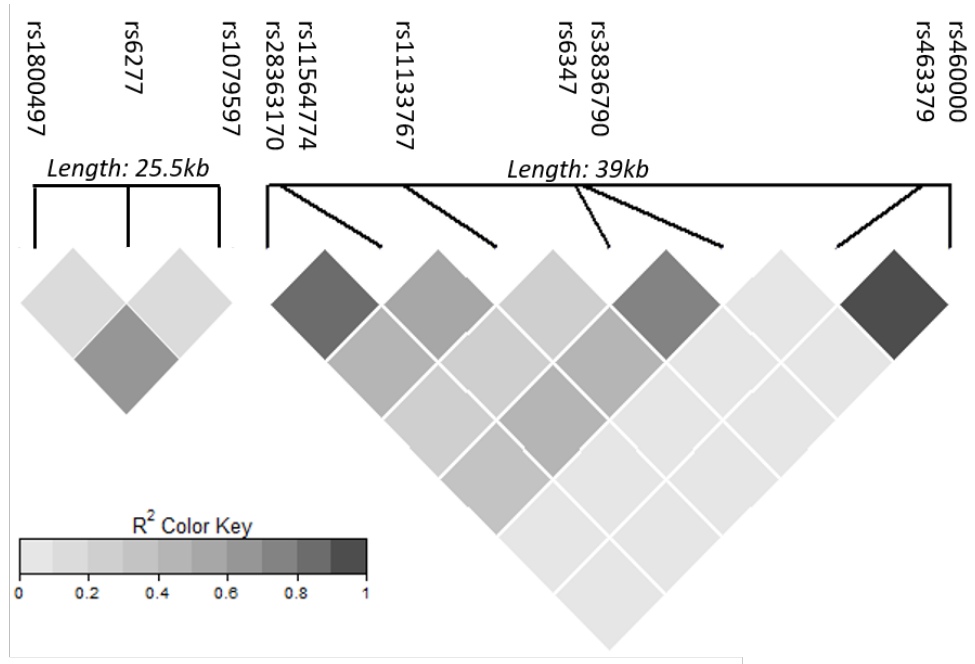

**Supplementary Figure 1.** The pairwise linkage disequilibrium (LD) and relative physical location of the determined SNPs of DRD2 on chromosome 11 (left) and of DAT1 on chromosome 5 (right).

Graphics and analysis are performed according to Shin et al. (Shin et al., 2006).

Shin, J.-H., Blay, S., McNeney, B., and Graham, J. (2006). LDheatmap: An R Function for Graphical Display of Pairwise Linkage Disequilibria Between Single Nucleotide Polymorphisms. *2006 16(Code Snippet 3)*, 9. doi: 10.18637/jss.v016.c03.
