# Supplementary material for: No Influence of Dopamine System Gene Variations on Acute Effects of MDMA
Source: Front Psychiatry. 2019 Oct 24;10:755. doi: 10.3389/fpsyt.2019.00755 (PMC6821788; doi:10.3389/fpsyt.2019.00755)
Supplement: Supplementary file 4 [file Table_4.xlsx]

## Sheet: Table S4
Table S4. Not corrected effects of polymorphisms in the dopaminergic system on the response to 125 mg MDMA (mean±SD (N) and statistics)
		DRD2/ANKK1 rs1800497									DRD2 rs6277									DRD2 rs1079597									DAT1 3'-UTR rs28363170									DAT1 Intron 8 rs3836790									DAT1 rs6347
		AA	AG	GG		F	p value	p valuea	η2		AA	AG	GG		F	p value	p valuea	η2		CC	CT	TT		F	p value	p valuea	η2		99	910	1010		F	p value	p valuea	η2		55	56	66		F	p value	p valuea	η2		CC	CT	TT
	N	2	46	101							50	73	26							111	37	1							8	56	79							7	54	85							12	60	77
	Female, N [%]	1 [50]	30 [65]	45 [45]							25 [50]	39 [53]	12 [46]							53 [48]	22 [59]	1 [100]							2 [25]	29 [52]	41 [52]							3 [43]	25 [46]	46 [54]							6 [50]	29 [48]	41 [53]
	Drug experience, N [%]	2 [100]	17 [37]	36 [36]							18 [36]	29 [40]	8 [31]							40 [36]	14 [38]	1 [100]							4 [50]	18 [32]	31 [39]							4 [57]	21 [39]	29 [34]							5 [42]	23 [38]	27 [35]
	MDMA plasma concentration Cmax, ng/ml	236 ± 76 (2)	239 ± 47 (46)	223 ± 49 (101)		1.709	NS	NS	0.023		225 ± 52 (50)	233 ± 47 (73)	221 ± 47 (26)		0.695	NS	NS	0.009		226 ± 49 (111)	234 ± 49 (37)	290 (1)		1.192	NS	NS	0.016		221 ± 44 (8)	227 ± 46 (56)	230 ± 50 (79)		0.139	NS	NS	0.002		218 ± 43 (7)	225 ± 54 (54)	231 ± 45 (85)		0.484	NS	NS	0.007		225 ± 46 (12)	224 ± 50 (60)	232 ± 48 (77)
	MDMA plasma concentration AUC6, ng*h/ml	964 ± 235 (2)	994 ± 199 (46)	944 ± 205 (101)		0.967	NS	NS	0.013		949 ± 213 (50)	974 ± 203 (73)	939 ± 186 (26)		0.375	NS	NS	0.005		949 ± 202 (111)	985 ± 208 (37)	1130 (1)		0.776	NS	NS	0.011		939 ± 183 (8)	958 ± 180 (56)	961 ± 214 (79)		0.042	NS	NS	0.001		894 ± 201 (7)	945 ± 211 (54)	972 ± 196 (85)		0.645	NS	NS	0.009		933 ± 221 (12)	947 ± 192 (60)	973 ± 210 (77)
Visual Analog Scale rating ΔAUEC6
	Any drug effect	196 ± 1 (2)	204 ± 100 (46)	182 ± 101 (101)		0.739	NS	NS	0.01		186 ± 115 (50)	187 ± 94 (73)	199 ± 83 (26)		0.172	NS	NS	0.002		186 ± 105 (111)	199 ± 81 (37)	195 (1)		0.234	NS	NS	0.003		198 ± 100 (8)	183 ± 94 (56)	191 ± 104 (79)		0.143	NS	NS	0.002		139 ± 78 (7)	188 ± 109 (54)	194 ± 100 (85)		0.971	NS	NS	0.013		153 ± 72 (12)	185 ± 105 (60)	197 ± 100 (77)
	Good drug effect	213 ± 50 (2)	229 ± 115 (46)	211 ± 121 (101)		0.331	NS	NS	0.005		226 ± 123 (50)	207 ± 111 (73)	226 ± 131 (26)		0.501	NS	NS	0.007		216 ± 123 (111)	220 ± 107 (37)	177 (1)		0.073	NS	NS	0.001		270 ± 139 (8)	204 ± 106 (56)	220 ± 125 (79)		1.156	NS	NS	0.016		164 ± 107 (7)	218 ± 120 (54)	221 ± 121 (85)		0.722	NS	NS	0.01		176 ± 100 (12)	216 ± 123 (60)	224 ± 118 (77)
	Bad drug effect	17 ± 24 (2)	24 ± 30 (46)	15 ± 46 (101)		0.842	NS	NS	0.011		4.9 ± 32 (50)	23 ± 43 (73)	29 ± 46 (26)		4.156	0.018*	NS	0.054		15 ± 44 (111)	28 ± 31 (37)	0 (1)		1.553	NS	NS	0.021		5.5 ± 9.1 (8)	20 ± 46 (56)	18 ± 41 (79)		0.429	NS	NS	0.006		11 ± 35 (7)	20 ± 46 (54)	18 ± 40 (85)		0.16	NS	NS	0.002		11 ± 29 (12)	18 ± 44 (60)	19 ± 41 (77)
	Drug liking	218 ± 40 (2)	243 ± 113 (46)	227 ± 128 (101)		0.267	NS	NS	0.004		239 ± 128 (50)	222 ± 114 (73)	242 ± 138 (26)		0.404	NS	NS	0.006		230 ± 129 (111)	238 ± 106 (37)	190 (1)		0.115	NS	NS	0.002		269 ± 138 (8)	222 ± 104 (56)	234 ± 132 (79)		0.543	NS	NS	0.008		203 ± 106 (7)	231 ± 126 (54)	235 ± 125 (85)		0.203	NS	NS	0.003		207 ± 100 (12)	227 ± 126 (60)	239 ± 125 (77)
	Stimulated	205 ± 53 (2)	163 ± 116 (46)	138 ± 106 (101)		1.1	NS	NS	0.015		134 ± 110 (50)	145 ± 107 (73)	175 ± 112 (26)		1.192	NS	NS	0.016		140 ± 111 (111)	165 ± 104 (37)	167 (1)		0.739	NS	NS	0.01		178 ± 111 (8)	126 ± 100 (56)	155 ± 114 (79)		1.617	NS	NS	0.023		125 ± 100 (7)	146 ± 109 (54)	150 ± 112 (85)		0.18	NS	NS	0.003		146 ± 86 (12)	138 ± 110 (60)	154 ± 112 (77)
	High-mood	210 ± 53 (2)	177 ± 110 (46)	164 ± 118 (101)		0.308	NS	NS	0.004		167 ± 121 (50)	168 ± 112 (73)	174 ± 115 (26)		0.031	NS	NS	0		169 ± 120 (111)	167 ± 102 (37)	172 (1)		0.005	NS	NS	0		215 ± 134 (8)	152 ± 104 (56)	175 ± 120 (79)		1.36	NS	NS	0.019		107 ± 70 (7)	174 ± 116 (54)	172 ± 117 (85)		1.089	NS	NS	0.015		136 ± 86 (12)	173 ± 121 (60)	171 ± 115 (77)
	Concentration	36 ± 30 (2)	-52 ± 69 (46)	-20 ± 65 (101)		4.523	0.012*	NS	0.058		-13 ± 68 (50)	-40 ± 68 (73)	-29 ± 64 (26)		2.429	0.092	NS	0.032		-24 ± 65 (111)	-47 ± 74 (37)	58 (1)		2.409	0.093	NS	0.032		1.2 ± 54 (8)	-36 ± 68 (56)	-29 ± 67 (79)		1.146	NS	NS	0.016		-47 ± 48 (7)	-26 ± 72 (54)	-33 ± 64 (85)		0.383	NS	NS	0.005		-39 ± 49 (12)	-22 ± 72 (60)	-33 ± 67 (77)
	Talkative	86 ± 2 (2)	2.9 ± 80 (46)	28 ± 72 (101)		2.532	0.083	NS	0.034		27 ± 69 (50)	23 ± 78 (73)	4.6 ± 80 (26)		0.775	NS	NS	0.01		29 ± 71 (111)	-6.7 ± 81 (37)	84 (1)		3.677	0.028*	NS	0.048		39 ± 68 (8)	1.4 ± 74 (56)	27 ± 69 (79)		2.555	0.081	NS	0.035		-11 ± 79 (7)	20 ± 81 (54)	25 ± 72 (85)		0.741	NS	NS	0.01		22 ± 74 (12)	19 ± 82 (60)	22 ± 71 (77)
	Appetite	14 ± 31 (2)	-14 ± 84 (23)	-29 ± 81 (47)		0.478	NS	NS	0.014		-55 ± 94 (26)	1.6 ± 64 (35)	-28 ± 79 (11)		3.866	0.026*	NS	0.101		-30 ± 80 (53)	-5.2 ± 87 (18)	-7.9 (1)		0.622	NS	NS	0.018		-29 ± 32 (7)	-27 ± 100 (28)	-17 ± 76 (35)		0.135	NS	NS	0.004		-95 ± 133 (3)	-39 ± 82 (25)	-10 ± 76 (43)		2.229	NS	NS	0.062		-43 ± 91 (7)	-41 ± 79 (27)	-6.9 ± 80 (38)
	Tired	94 ± 60 (2)	40 ± 111 (33)	25 ± 78 (74)		0.824	NS	NS	0.015		17 ± 71 (36)	36 ± 93 (55)	42 ± 106 (18)		0.677	NS	NS	0.013		29 ± 80 (80)	35 ± 113 (28)	51 (1)		0.078	NS	NS	0.001		35 ± 89 (7)	30 ± 92 (44)	38 ± 84 (53)		0.093	NS	NS	0.002		-38 ± 52 (5)	28 ± 93 (41)	38 ± 83 (61)		1.838	NS	NS	0.034		6.9 ± 69 (10)	24 ± 90 (42)	40 ± 91 (57)
	Fear	2.4 ± 3.5 (2)	6.2 ± 13 (31)	7.5 ± 29 (64)		0.061	NS	NS	0.001		3.2 ± 8.7 (35)	6.3 ± 16 (47)	18 ± 54 (15)		1.962	NS	NS	0.04		6.7 ± 27 (73)	8.2 ± 15 (23)	0 (1)		0.068	NS	NS	0.001		2.1 ± 10 (7)	3.7 ± 9.3 (33)	9.8 ± 32 (55)		0.778	NS	NS	0.017		1.7 ± 2.9 (3)	4.8 ± 17 (35)	8.7 ± 29 (58)		0.335	NS	NS	0.007		1 ± 2 (7)	4.6 ± 16 (40)	9.7 ± 31 (50)
	Happy	81 (1)	55 ± 69 (32)	62 ± 72 (73)		0.148	NS	NS	0.003		79 ± 69 (32)	55 ± 66 (53)	46 ± 81 (21)		1.662	NS	NS	0.031		61 ± 71 (78)	57 ± 71 (27)	81 (1)		0.084	NS	NS	0.002		34 ± 40 (3)	50 ± 66 (40)	67 ± 74 (59)		0.84	NS	NS	0.017		30 ± 26 (4)	59 ± 67 (42)	65 ± 76 (57)		0.49	NS	NS	0.01		50 ± 31 (7)	55 ± 66 (45)	66 ± 78 (54)
	want to be hugged	NA (0)	-1.6 ± 79 (23)	20 ± 75 (54)		1.297	NS	NS	0.017		12 ± 61 (24)	18 ± 88 (38)	5.1 ± 68 (15)		0.148	NS	NS	0.004		19 ± 72 (58)	-2.1 ± 87 (19)	NA (0)		1.068	NS	NS	0.014		0 (1)	9.4 ± 63 (28)	10 ± 75 (44)		0.011	NS	NS	0		19 ± 44 (4)	17 ± 75 (29)	13 ± 81 (42)		0.034	NS	NS	0.001		18 ± 38 (5)	12 ± 71 (33)	15 ± 85 (39)
	want to hug	NA (0)	3.0 ± 79 (23)	15 ± 65 (54)		0.472	NS	NS	0.006		9.4 ± 62 (24)	19 ± 80 (38)	-5.6 ± 50 (15)		0.697	NS	NS	0.018		15 ± 62 (58)	-0.8 ± 88 (19)	NA (0)		0.773	NS	NS	0.01		0 (1)	13 ± 65 (28)	6.4 ± 69 (44)		0.096	NS	NS	0.003		13 ± 32 (4)	17 ± 71 (29)	9 ± 73 (42)		0.112	NS	NS	0.003		22 ± 35 (5)	9.9 ± 66 (33)	11 ± 76 (39)
Vital signs parameters ΔAUEC6
	Systolic blood pressure, mmHg	75 ± 60 (2)	100 ± 38 (46)	96 ± 47 (101)		0.36	NS	NS	0.005		97 ± 49 (50)	96 ± 46 (73)	100 ± 30 (26)		0.054	NS	NS	0.001		96 ± 47 (111)	100 ± 36 (37)	117 (1)		0.205	NS	NS	0.003		96 ± 44 (8)	97 ± 40 (56)	97 ± 49 (79)		0.005	NS	NS	0		92 ± 26 (7)	99 ± 40 (54)	96 ± 49 (85)		0.115	NS	NS	0.002		94 ± 21 (12)	99 ± 45 (60)	96 ± 47 (77)
	Diastolic blood pressure, mmHg	34 ± 2 (2)	64 ± 32 (46)	60 ± 34 (101)		0.802	NS	NS	0.011		64 ± 38 (50)	60 ± 29 (73)	57 ± 36 (26)		0.414	NS	NS	0.006		62 ± 35 (111)	60 ± 29 (37)	33 (1)		0.4	NS	NS	0.005		66 ± 25 (8)	60 ± 30 (56)	59 ± 36 (79)		0.15	NS	NS	0.002		59 ± 23 (7)	61 ± 32 (54)	60 ± 35 (85)		0.015	NS	NS	0		63 ± 22 (12)	61 ± 35 (60)	61 ± 34 (77)
	Mean arterial pressure, mmHg	47 ± 19 (2)	76 ± 31 (46)	72 ± 35 (101)		0.733	NS	NS	0.01		75 ± 39 (50)	72 ± 31 (73)	71 ± 30 (26)		0.167	NS	NS	0.002		73 ± 36 (111)	73 ± 27 (37)	61 (1)		0.069	NS	NS	0.001		76 ± 30 (8)	72 ± 30 (56)	72 ± 37 (79)		0.051	NS	NS	0.001		70 ± 20 (7)	74 ± 30 (54)	73 ± 36 (85)		0.049	NS	NS	0.001		73 ± 17 (12)	74 ± 34 (60)	73 ± 35 (77)
	Heat rate beat/min	80 ± 37 (2)	78 ± 54 (46)	72 ± 50 (101)		0.239	NS	NS	0.003		82 ± 52 (50)	68 ± 51 (73)	74 ± 50 (26)		1.123	NS	NS	0.015		72 ± 51 (111)	78 ± 53 (37)	106 (1)		0.371	NS	NS	0.005		51 ± 37 (8)	75 ± 49 (56)	71 ± 52 (79)		0.825	NS	NS	0.012		60 ± 27 (7)	80 ± 50 (54)	70 ± 53 (85)		0.877	NS	NS	0.012		58 ± 36 (12)	77 ± 51 (60)	74 ± 53 (77)
	Rate pressure product, mmHg/min	15309 ± 7875 (2)	17790 ± 9047 (46)	16704 ± 8811 (101)		0.274	NS	NS	0.004		18201 ± 8936 (50)	16128 ± 9031 (73)	17256 ± 8097 (26)		0.826	NS	NS	0.011		16675 ± 8802 (111)	17953 ± 9082 (37)	20877 (1)		0.383	NS	NS	0.005		13894 ± 7599 (8)	17211 ± 8238 (56)	16682 ± 9369 (79)		0.494	NS	NS	0.007		14250 ± 4529 (7)	18116 ± 8115 (54)	16441 ± 10000 (85)		0.935	NS	NS	0.013		14361 ± 5554 (12)	17607 ± 8283 (60)	16977 ± 10000 (77)
	Body temperature, °C	1.2 ± 0.7 (2)	1.0 ± 2.0 (46)	1.2 ± 2.9 (101)		0.056	NS	NS	0.001		1.4 ± 3.3 (50)	0.9 ± 2 (73)	1.5 ± 1.6 (26)		0.881	NS	NS	0.012		1.1 ± 2.8 (111)	1.3 ± 2.3 (37)	1.7 (1)		0.082	NS	NS	0.001		0.6 ± 2 (8)	1.2 ± 2.9 (56)	1.1 ± 2.6 (79)		0.184	NS	NS	0.003		3.3 ± 4.0 (7)	1.2 ± 2.4 (54)	1 ± 3 (85)		2.429	0.092	NS	0.033		2.1 ± 3.5 (12)	0.9 ± 2 (60)	1.2 ± 2.7 (77)
Adjective Mood Rating Scale rating ΔAUEC5
	activity	30 ± 11 (2)	-0.6 ± 18 (46)	0 ± 20 (100)		2.438	0.091	NS	0.033		0.6 ± 22 (50)	0.1 ± 20 (72)	0 ± 15 (26)		0.011	NS	NS	0		0.4 ± 20 (110)	-1.3 ± 18 (37)	38 (1)		1.958	NS	NS	0.026		5.3 ± 21 (8)	-1.2 ± 18 (56)	-0.6 ± 20 (78)		0.393	NS	NS	0.006		-5.5 ± 17 (7)	0.9 ± 21 (54)	-0.2 ± 19 (84)		0.337	NS	NS	0.005		2.8 ± 21 (12)	1.1 ± 21 (60)	-0.8 ± 19 (76)
	high mood	24 ± 0 (2)	12 ± 18 (46)	15 ± 21 (100)		0.569	NS	NS	0.008		17 ± 21 (50)	14 ± 19 (72)	9.6 ± 21 (26)		1.238	NS	NS	0.017		15 ± 21 (110)	11 ± 17 (37)	24 (1)		0.757	NS	NS	0.01		6.3 ± 8.1 (8)	9.4 ± 17 (56)	18 ± 22 (78)		3.958	0.021*	NS	0.054		3.3 ± 12 (7)	14 ± 22 (54)	16 ± 20 (84)		1.261	NS	NS	0.017		11 ± 13 (12)	15 ± 23 (60)	14 ± 19 (76)
	fear/depression	-4.0 ± 5.7 (2)	-0.3 ± 1.e+01 (38)	-0.9 ± 12 (84)		0.131	NS	NS	0.002		-3.9 ± 11 (41)	0.5 ± 9 (61)	1.4 ± 16 (22)		2.538	0.083	NS	0.04		-0.7 ± 11 (91)	-0.9 ± 11 (32)	0 (1)		0.006	NS	NS	0		-1.3 ± 7.8 (8)	0.4 ± 12 (51)	-1.6 ± 11 (59)		0.424	NS	NS	0.007		-7 ± 14 (7)	0 ± 11 (44)	-0.6 ± 11 (70)		1.205	NS	NS	0.02		-6 ± 12 (12)	-0.7 ± 12 (47)	0.2 ± 10 (65)
N, number of subjects; SD, standard deviation; NS, not significant; Δ, values are change scores from placebo; AUEC, area under the effect-time curve; ap value additionally corrected for multiple comparisons according to the Nyholt method; η2, eta square; *, uncorrected p < 0.05
